# Supplementary material for: Solubility and Thermal Degradation of Quercetin in CO2-Expanded Liquids
Source: PubMed Central journal article supplement (PMC7730818; doi:10.3390/molecules25235582), 2020-11-27
Supplement: molecules-25-05582-s001.pdf [file molecules-25-05582-s001.pdf]

# Supplementary Material

## Solubility and thermal degradation of quercetin in CO<sub>2</sub>-expanded liquids

Larissa P. Cunico<sup>1</sup>, Andrés Medina Cobo<sup>1</sup>, Said Al-Hamimi<sup>1,2</sup>, Charlotta Turner<sup>1</sup>

<sup>1</sup> Lund University, Department of Chemistry, Centre for Analysis and Synthesis (CAS), P.O. Box 124, SE-221 00 Lund, Sweden; larissa.cunico@chem.lu.se; amcobo@ucm.es; said.alhamimi@oq.com.

<sup>2</sup> OQ, SablaX, P.O box 261, P.C 118, Muscat, Oman

\* Correspondence: charlotta.turner@chem.lu.se (Charlotta Turner), Tel.: +46 46 222 8125.

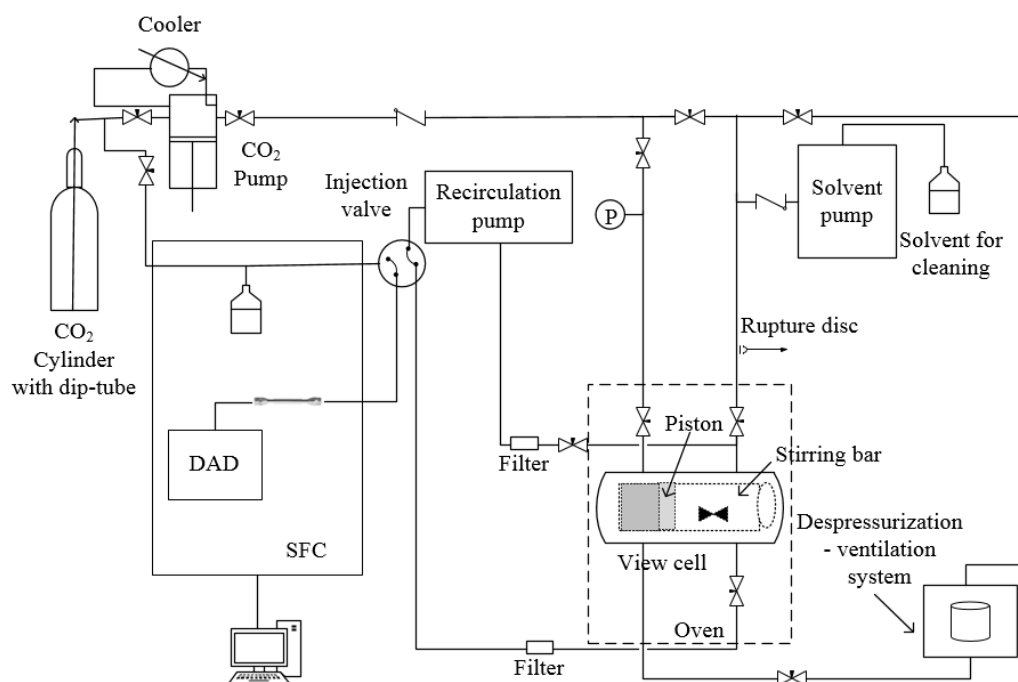

**Figure S1.** Scheme of the equipment used. For a detailed description on how to operate the system, please see our previous study [Cunico, L. P. et al. Experimental measurements and modeling of curcumin solubility in CO<sub>2</sub>-expanded ethanol. *J. Supercrit. Fluids* 2017, 130, 381-388. Open access: <https://doi.org/10.1016/j.supflu.2017.06.018>].

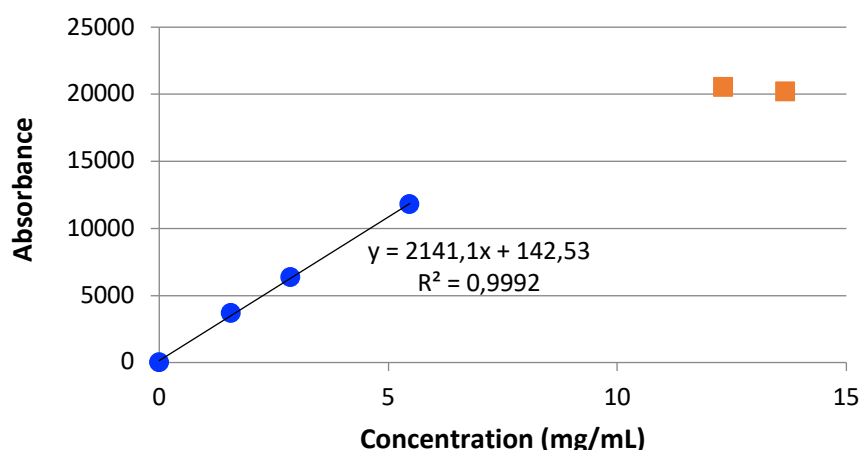

**Figure S2.** Example of a calibration curve (here: quercetin in CO<sub>2</sub>-expanded ethyl lactate, at 343 K, 10 MPa, containing 10 % mol of CO<sub>2</sub>). Blue-filled circles mark the calibration points, while the orange-filled squares mark the plateau (horizontal) values giving the solubility of quercetin in the solvent.
